# Supplementary material for: Synthesis of Zn-based metal–organic frameworks in ionic liquid microemulsions at room temperature
Source: PubMed Central journal article supplement — RSC Adv. 2018 Jul 23;8(46):26237–42. doi: 10.1039/c8ra04573a (PMC9082767; doi:10.1039/c8ra04573a), 2018-07-23
Supplement: RA-008-C8RA04573A-s001.pdf [file RA-008-C8RA04573A-s001.pdf]

## Supporting Information

### Synthesis of Zn-Based Metal-Organic Frameworks in Ionic Liquid Microemulsions at Room Temperature

Ranfeng Ye,<sup>a</sup> Ni Min,<sup>a</sup> Yuanyuan Xu,<sup>a</sup> Hao Chen<sup>a</sup> and Shengqing Li<sup>\*a</sup>

<sup>a</sup> College of Science, Huazhong Agricultural University, Wuhan, Hubei 430070, People's Republic of China. E-mail: [sqingli@mail.hzau.edu.cn](mailto:sqingli@mail.hzau.edu.cn)

**Fig. S1** The FT-IR characterization of Zn-MOFs prepared in the ionic liquid microemulsion A-F marked in Figure 1.

**Fig. S2** The TGA analysis of Zn-MOFs prepared in the ionic liquid microemulsion A and C marked in Figure 1.

**Fig. S3** The BET characterization of Zn-MOFs prepared in the ionic liquid microemulsion C marked in Figure 1.

**Fig. S4** The <sup>1</sup>H NMR image of ionic liquid [Bmim]PF<sub>6</sub>.

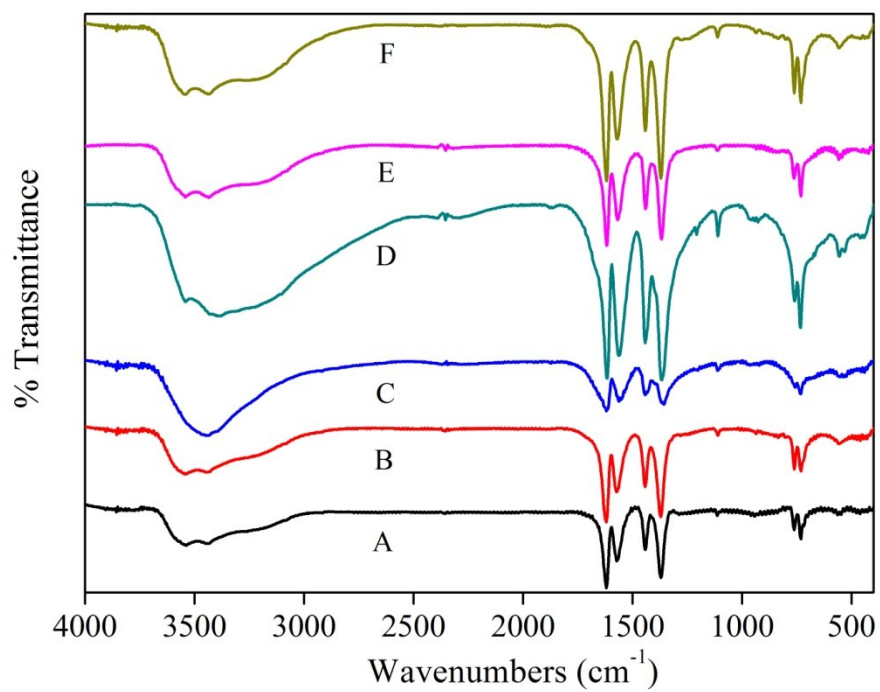

**Fig. S1** The FT-IR characterization of Zn-MOFs prepared in the ionic liquid microemulsion A-F marked in Figure 1.

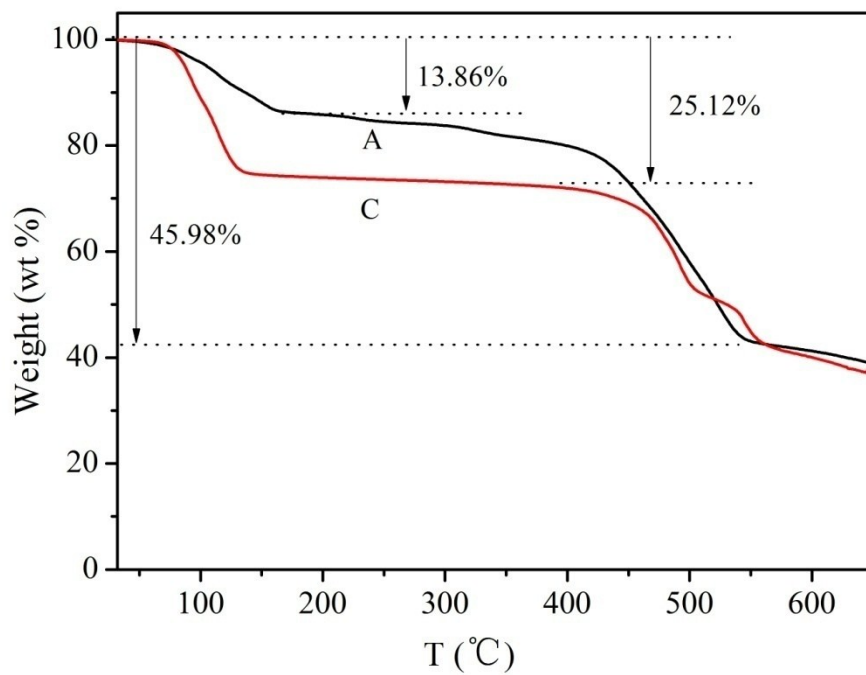

**Fig. S2** The TGA analysis of Zn-MOFs prepared in the ionic liquid microemulsion A and C marked in Figure 1.

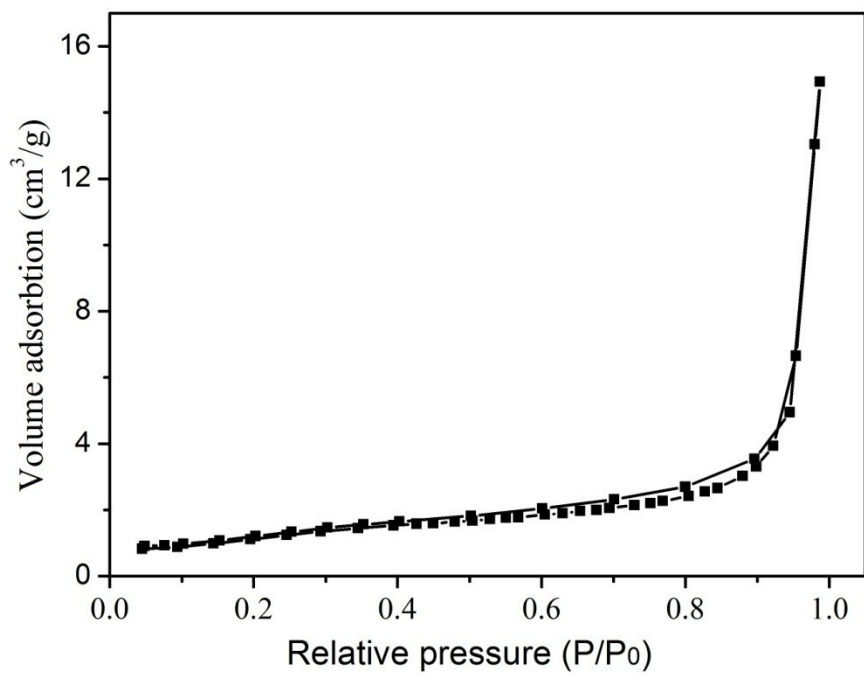

**Fig. S3** The BET characterization of Zn-MOFs prepared in the ionic liquid microemulsion C marked in Figure 1.

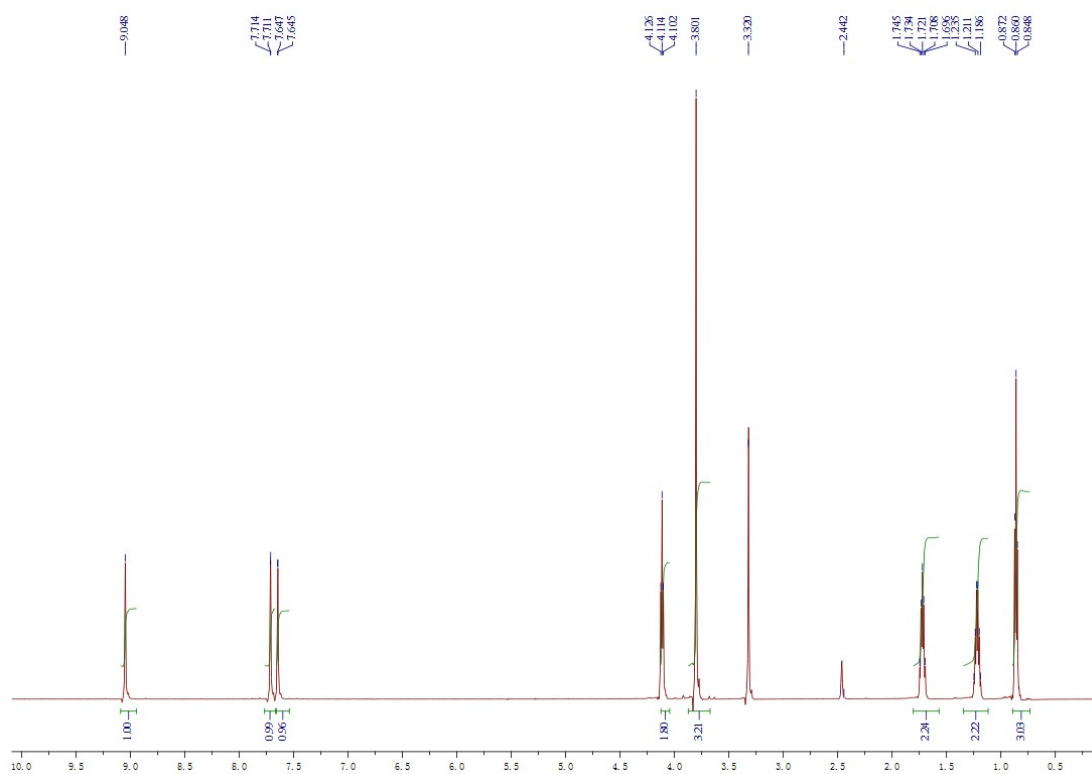

**Fig. 4** The  $^1\text{H}$  NMR image of ionic liquid [Bmim] $\text{PF}_6$ .
